# Supplementary material
Source: PubMed Central journal article supplement (PMC3244555)

## Structure and Stability of Higher-Order Human Telomeric Quadruplexes

*Luigi Petraccone<sup>1,2,\*</sup>, Charles Spink<sup>3</sup>, John O. Trent<sup>2</sup>, Nichola C. Garbett<sup>2</sup>, Chongkham S. Mekmaysy<sup>2</sup>, Concetta Giancola<sup>1</sup> and Jonathan B. Chaires<sup>2\*</sup>*

**Figure S1.** Sedimentation coefficient distributions as determined by the program Sedfit are shown for (TTAGGG)<sub>4</sub> (Panel A), (TTAGGG)<sub>4</sub>TT (Panel B), (TTAGGG)<sub>8</sub> (Panel C), (TTAGGG)<sub>8</sub>TT (Panel D), (TTAGGG)<sub>12</sub> (Panel E) and (TTAGGG)<sub>12</sub>TT (Panel F).

**Figure S2.** A) Structures of the Hybrid-1, Hybrid-2 and propeller quadruplexes; B) Schematic representation of the two trimer models simulated in this study.

**Figure S3.** CD melting and annealing curves for all the oligonucleotides used in this study.

**Table 1S.** Sedimentation coefficient values.

**Figure S4.** Singular values from SVD analysis of the CD vs temperature spectra for the six oligonucleotides.

**Table 2S.** Results from SVD analysis of the CD vs temperature spectra for the six oligonucleotides.

**Figure S5.** Deconvolution of (TTAGGG)<sub>n</sub> thermograms.

**FIGURE S1**

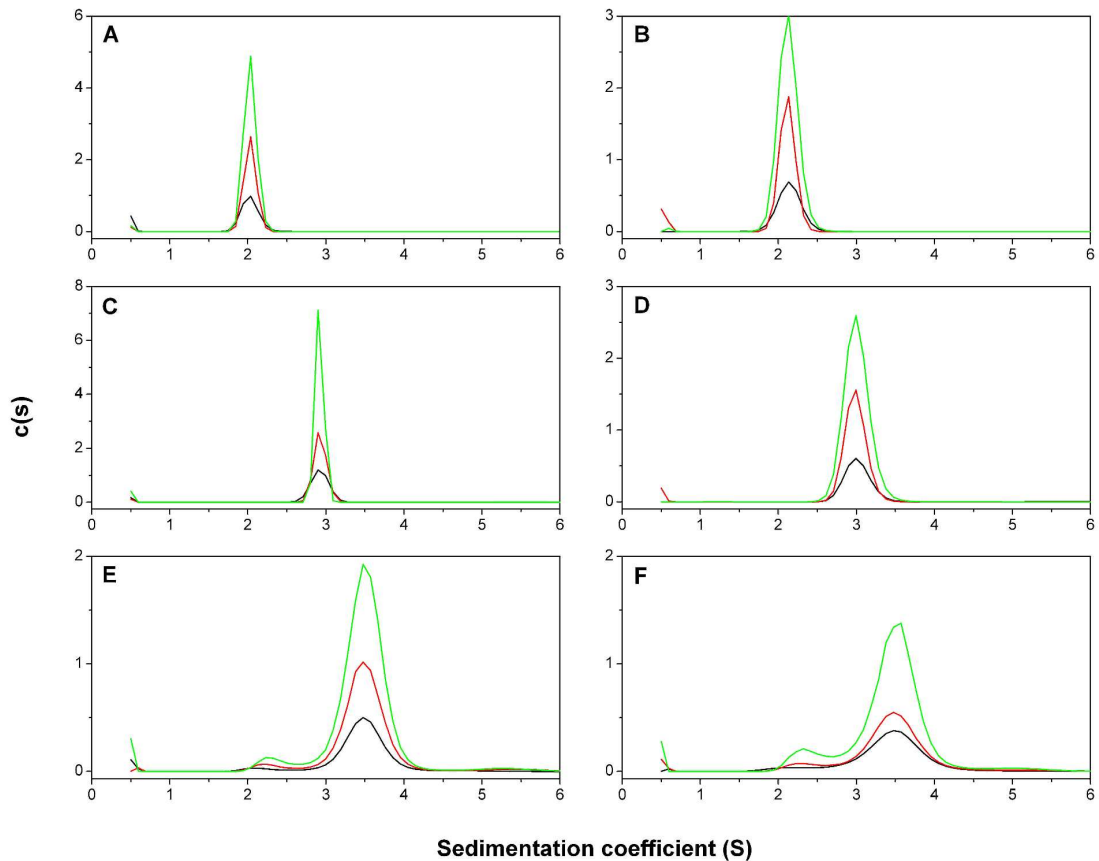

**Figure S1.** Sedimentation coefficient distributions as determined by the program Sedfit are shown for  $(TTAGGG)_4$  (Panel A),  $(TTAGGG)_4TT$  (Panel B),  $(TTAGGG)_8$  (Panel C),  $(TTAGGG)_8TT$  (Panel D),  $(TTAGGG)_{12}$  (Panel E) and  $(TTAGGG)_{12}TT$  (Panel F). Data for three different loading concentrations of  $A_{260}(1.2 \text{ cm}) \sim 0.25, 0.5$  and  $1$  are shown by the black, red and green lines, respectively.

FIGURE S2

A)

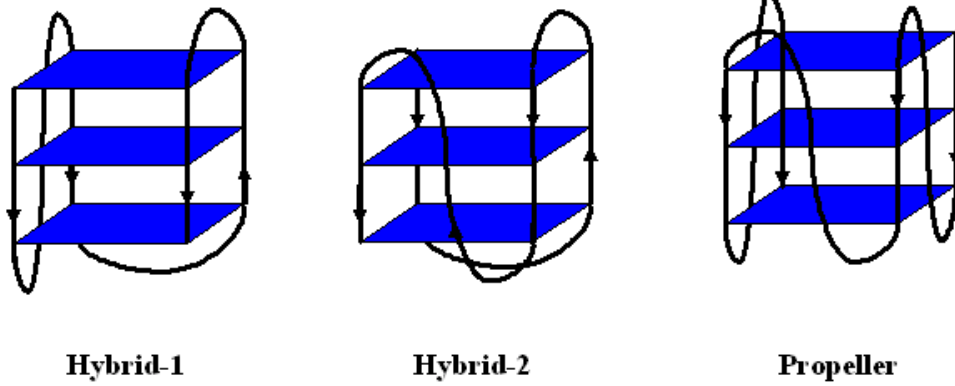

B)

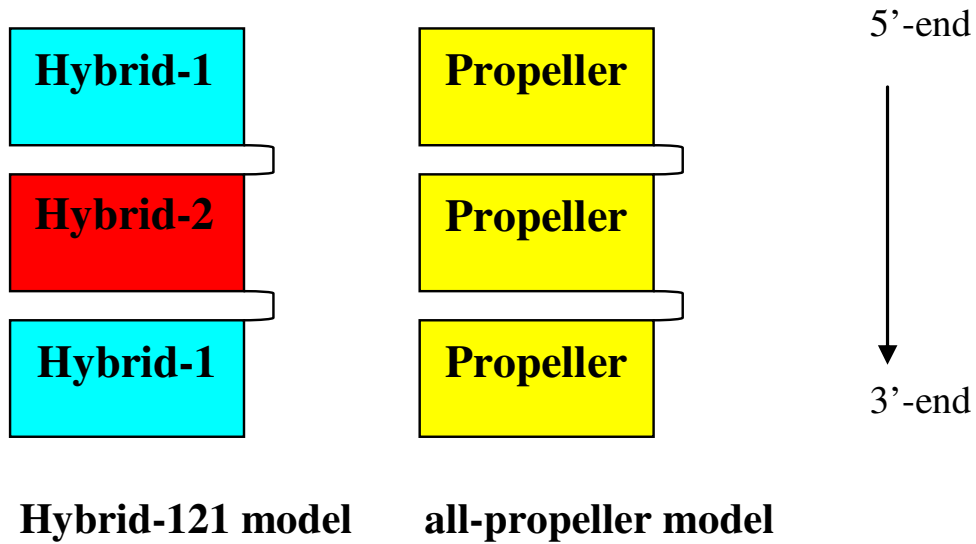

**Figure S2.** A) Structures of the Hybrid-1, Hybrid-2 and propeller quadruplexes; B) Schematic representation of the two trimer models simulated in this study, the 5'-3' orientation is indicated by the black arrow on the left.

**FIGURE S3**

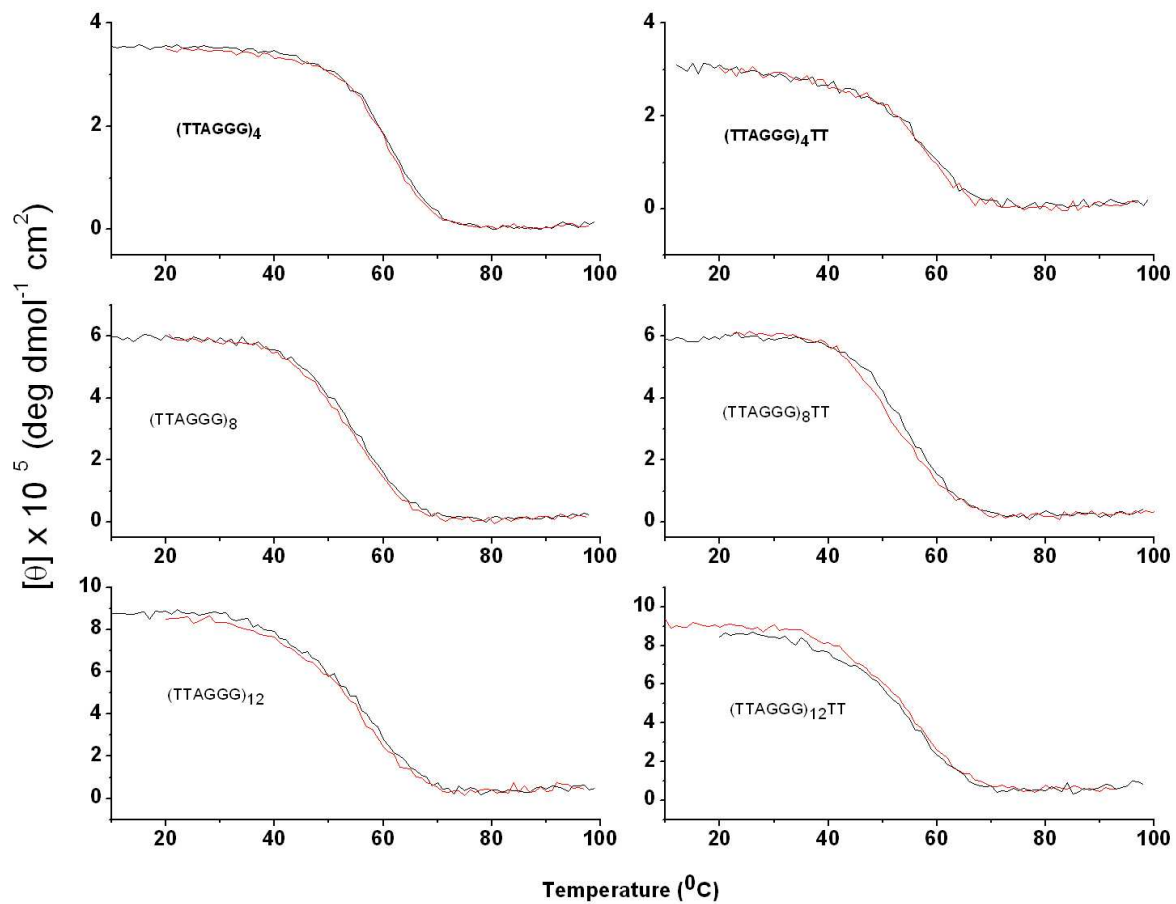

**Figure S3.** CD melting (black) and cooling (red) curves for all the oligonucleotides used in this study.

**Table 1S****Table 1S: Sedimentation coefficients values**

| <b>DNA sequence</b>       | <b>S(20,w)<sup>a</sup></b> | <b>S(20,buffer)</b> | <b>Calculated in buffer<sup>b</sup></b>           |
|---------------------------|----------------------------|---------------------|---------------------------------------------------|
| (TTAGGG) <sub>4</sub>     | 2.05 ± 0.01                | 2.03 ± 0.01         |                                                   |
| (TTAGGG) <sub>4</sub> TT  | 2.15 ± 0.01                | 2.13 ± 0.01         |                                                   |
| (TTAGGG) <sub>8</sub>     | 2.95 ± 0.01                | 2.92 ± 0.01         |                                                   |
| (TTAGGG) <sub>8</sub> TT  | 3.02 ± 0.01                | 2.99 ± 0.01         |                                                   |
| (TTAGGG) <sub>12</sub>    | 3.51 ± 0.01 (first peak)   | 3.49 ± 0.01         | 3.40 ± 0.06 (hybrid-121)                          |
|                           | 2.34 ± 0.03 (second peak)  | 2.32 ± 0.03         | 3.87 ± 0.02 (all-propeller)<br>2.45 ± 0.08 (dt12) |
| (TTAGGG) <sub>12</sub> TT | 3.52 ± 0.01 (first peak)   | 3.49 ± 0.01         |                                                   |
|                           | 2.40 ± 0.04 (second peak)  | 2.38 ± 0.04         |                                                   |

<sup>a</sup> Corrected to standard conditions of water, 20 °C. <sup>b</sup> Calculated from the MD trajectories with the program HYDROPRO5 in the same buffer conditions used in the experiments. All values are expressed in Svedberg units (S).

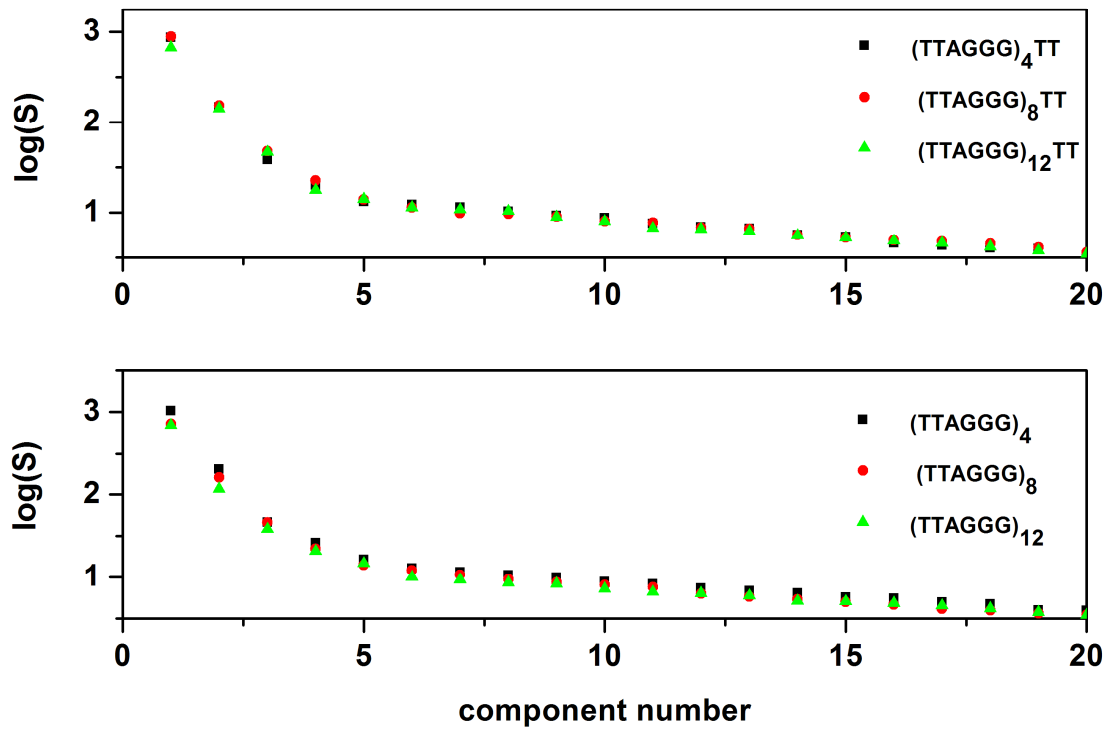

**Figure S4.** Plots of the logarithm of the first 20 singular values values resulting for the SVD analysis of the six sequences of this study.

**Table 2S**

**Table 2S** Results from Singular Values Decomposition analysis of the CD spectra series on changing the temperature.\*

| <b>(TTAGGG)<sub>4</sub></b>  |                   |                   | <b>(TTAGGG)<sub>4</sub>TT</b>  |                   |                   |
|------------------------------|-------------------|-------------------|--------------------------------|-------------------|-------------------|
| <b>S</b>                     | <b>U autocorr</b> | <b>V autocorr</b> | <b>S</b>                       | <b>U autocorr</b> | <b>V autocorr</b> |
| 1030.6                       | 0.9986            | 0.9887            | 864.4                          | 0.9987            | 0.9890            |
| 201.3                        | 0.9971            | 0.9813            | 147.1                          | 0.9969            | 0.9750            |
| 46.2                         | 0.9986            | 0.8947            | 38.6                           | 0.9971            | 0.8165            |
| 26.1                         | 0.9850            | 0.7232            | 20.1                           | 0.9938            | 0.5480            |
| 16.4                         | 0.9986            | 0.1805            | 13.2                           | 0.9974            | -0.0236           |
| 12.9                         | 0.9967            | -0.0362           | 12.2                           | 0.9932            | 0.0871            |
| 11.6                         | 0.9917            | 0.0123            | 11.5                           | 0.9972            | -0.2503           |
| 10.7                         | 0.9939            | -0.1105           | 10.3                           | 0.9968            | -0.1763           |
| <b>(TTAGGG)<sub>8</sub></b>  |                   |                   | <b>(TTAGGG)<sub>8</sub>TT</b>  |                   |                   |
| <b>S</b>                     | <b>U autocorr</b> | <b>V autocorr</b> | <b>S</b>                       | <b>U autocorr</b> | <b>V autocorr</b> |
| 713.4                        | 0.9984            | 0.9870            | 888.6                          | 0.9986            | 0.9899            |
| 159.8                        | 0.9968            | 0.9782            | 153.5                          | 0.9961            | 0.9811            |
| 46.1                         | 0.9996            | 0.9016            | 47.8                           | 0.9996            | 0.8678            |
| 22.1                         | 0.9984            | 0.7508            | 22.6                           | 0.9858            | 0.5883            |
| 14.1                         | 0.9968            | -0.1066           | 14.0                           | 0.99778           | 0.1109            |
| 12.2                         | 0.9948            | 0.0359            | 11.4                           | 0.9949            | 0.0309            |
| 10.7                         | 0.9975            | -0.1167           | 9.9                            | 0.9848            | -0.0015           |
| 9.5                          | 0.9964            | -0.1527           | 9.6                            | 0.9962            | -0.1273           |
| <b>(TTAGGG)<sub>12</sub></b> |                   |                   | <b>(TTAGGG)<sub>12</sub>TT</b> |                   |                   |
| <b>S</b>                     | <b>U autocorr</b> | <b>V autocorr</b> | <b>S</b>                       | <b>U autocorr</b> | <b>V autocorr</b> |
| 802.8                        | 0.9987            | 0.9876            | 670.4                          | 0.9985            | 0.9868            |
| 142.9                        | 0.9972            | 0.9815            | 142.6                          | 0.9965            | 0.9747            |
| 40.9                         | 0.9993            | 0.9074            | 46.5                           | 0.9997            | 0.8943            |
| 19.5                         | 0.9825            | 0.4477            | 17.7                           | 0.9858            | 0.4993            |
| 11.7                         | 0.9984            | 0.1752            | 14.0                           | 0.9986            | 0.050             |
| 10.9                         | 0.9964            | 0.0291            | 11.4                           | 0.9955            | -0.0980           |
| 9.9                          | 0.9972            | 0.1834            | 10.8                           | 0.9966            | 0.0629            |
| 8.2                          | 0.9886            | -0.0668           | 10.4                           | 0.9958            | -0.0332           |

\* S is the singular value, Uautocorr and Vautocorr represent the autocorrelations factors of the column of the matrix of the basis spectra (U matrix) and the matrix of the coefficient vectors (V matrix).

## Comments on the analysis of (TTAGGG)<sub>n</sub> and (TTAGGG)<sub>n</sub>TT DSC Transitions

Below is a summary of how each of the data sets was analyzed with the best resolved numbers for enthalpies, entropies and transition temperatures for the resolved components. Table 2 in the main text summarizes the results. Species plots and fitted thermograms are shown in Figure 5 (main text) and Figure S5 (below).

### 1. (TTAGGG)<sub>4</sub>

a. Recursion treatment of this transition showed almost two-state behavior with a small amount of an intermediate.

Resolved thermodynamic data:

$$\Delta h_i = 68.7 \text{ kJ/mole}; \quad \Delta s_i = 202 \text{ J/K-mole};$$

$$\Delta h_n = 172.3 \text{ kJ/mole}; \quad \Delta s_n = 520 \text{ J/K-mole};$$

b. The intermediate did not appear to be a sequential transition and has low enthalpy, so to analyze the data the small cumulative enthalpy of the intermediate was subtracted from the experimental cumulative enthalpy and the resulting curve was treated as two-state to yield:

$$\Delta H = 228 \text{ kJ/mole}; \quad \Delta S = 681 \text{ J/K-mole}; \quad T_m = 63.09$$

This procedure may overcorrect at low temperature, but the correction is small so doesn't make too much difference.

### 2. (TTAGGG)<sub>4</sub>TT

a. This transition is clearly a two-state melt, so was analyzed as such.

$$\text{Result: } \Delta H = 213 \text{ kJ/mole}; \quad \Delta S = 639 \text{ J/K-mole}; \quad T_m = 59.84$$

### 3. (TTAGGG)<sub>8</sub>

a. This one was the hardest to analyze. There is a rather large seemingly non-sequential intermediate from the recursion analysis. Using a 2-intermediate model and the recursion results the best fit gave the following:

$$\Delta h_1 = 138.6 \text{ kJ/mole}; \quad \Delta s_1 = 432 \text{ J/K-mole}; \quad T_1 = 47.61$$

$$\Delta h_2 = 171.2 \text{ "}; \quad \Delta s_2 = 524 \text{ "}; \quad T_2 = 53.53$$

$$\Delta h_n = 203.4 \text{ "}; \quad \Delta s_n = 605 \text{ "}; \quad T_n = 63.08$$

b. Assuming the first component is not part of the sequential transition and subtracting its contribution to the total cumulative enthalpy yields the results for a single intermediate:

$$\Delta h_i = 263 \text{ kJ/mole}; \quad \Delta s_i = 806 \text{ J/K-mole}; \quad T_i = 53.44$$

$$\Delta h_n = 249 \text{ "}; \quad \Delta s_n = 739 \text{ "}; \quad T_n = 63.33$$

### 4. (TTAGGG)<sub>8</sub>TT

a. Recursion of this one showed a small low temperature component with small enthalpy, the results of the two intermediate analysis being:

$$\Delta h_1 = 32.4 \text{ kJ/mole}; \quad \Delta s_1 = 83 \text{ J/K-mole}; \quad T_1 = 43.97$$



$$\begin{array}{lll} \Delta h_2 = 191.9 & \text{"} & \Delta s_2 = 607 & \text{"} & T_2 = 42.93 \\ \Delta h_n = 216.8 & \text{"} & \Delta s_n = 647 & \text{"} & T_n = 61.87 \end{array}$$

- b. Again the first component was subtracted from the overall cumulative enthalpy and treated as though there is a single intermediate.

$$\begin{array}{lll} \text{Results: } \Delta h_1 = 219 \text{ kJ/mole;} & \Delta s_1 = 676 \text{ J/K-mole;} & T_1 = 51.96 \\ \Delta h_n = 222 & \text{"} & \Delta s_n = 662 & \text{"} & T_n = 61.82 \end{array}$$

These numbers seem reasonable in light of above monomers.

5. (TTAGGG)<sub>12</sub>

- a. Recursion in this case was straight-forward 2-intermediate states, so was analyzed accordingly.

$$\begin{array}{lll} \text{Results: } \Delta h_1 = 159.1 \text{ kJ/mole;} & \Delta s_1 = 503 \text{ J/K-mole;} & T_1 = 43.05 \\ \Delta h_2 = 203.4 & \text{"} & \Delta s_2 = 620 & \text{"} & T_2 = 54.87 \\ \Delta h_n = 216.0 & \text{"} & \Delta s_n = 646 & \text{"} & T_n = 61.15 \end{array}$$

6. (TTAGGG)<sub>12</sub>TT

- a. Same as trimer above.

$$\begin{array}{lll} \text{Results: } \Delta h_1 = 176.1 \text{ kJ/mole;} & \Delta s_1 = 553 \text{ J/K-mole;} & T_1 = 45.37 \\ \Delta h_2 = 221.4 & \text{"} & \Delta s_2 = 672 & \text{"} & T_2 = 56.30 \\ \Delta h_3 = 203.5 & \text{"} & \Delta s_3 = 606 & \text{"} & T_3 = 62.59 \end{array}$$

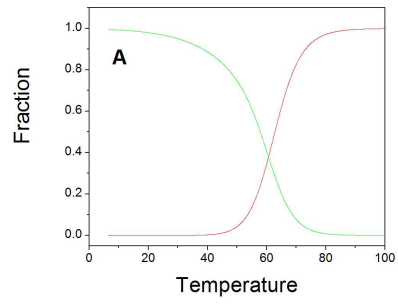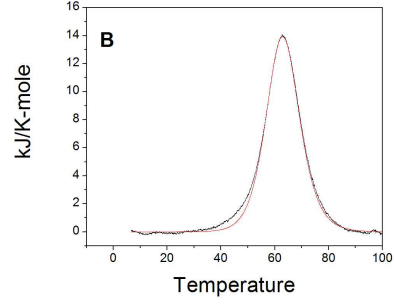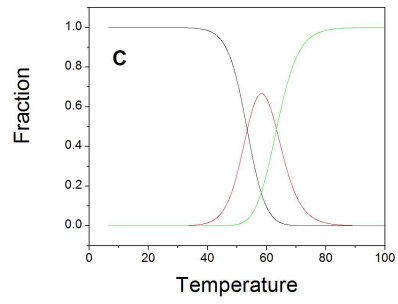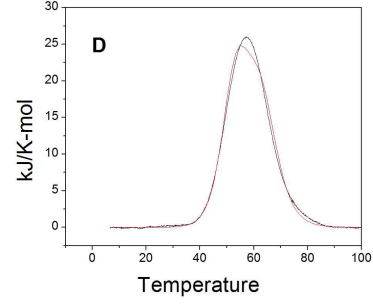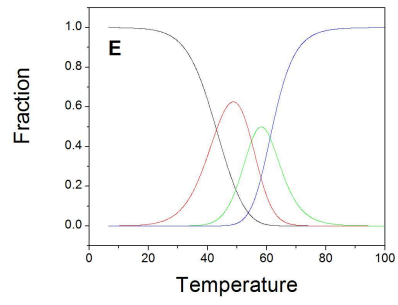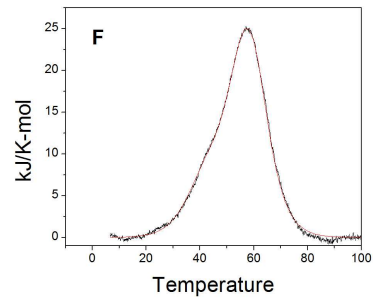

Supplement: NIHMS339475-supplement-1_si_001.pdf [file NIHMS339475-supplement-1_si_001.pdf]
